# Supplementary material for: Mixing layer height on the North China Plain and meteorologicalevidence of serious air pollution in southern Hebei
Source: Copernicus journal article supplement (doi:10.5194/acp-2017-295), 2017-05-29
Supplement: Supplementary file 1 [file acp-2017-295-supplement.pdf]

## Mixing layer height on the North China Plain and meteorological

### evidence of serious air pollution in Southern Hebei

Xiaowan Zhu<sup>1,3</sup>, Guiqian Tang<sup>1,2\*</sup>, Jianping Guo<sup>4</sup>, Bo Hu<sup>1</sup>, Tao Song<sup>1</sup>, Lili Wang<sup>1</sup>, Jinyuan Xin<sup>1</sup>, Wenkang Gao<sup>1</sup>, Christoph Munkel<sup>5</sup>, Klaus Schäfer<sup>6</sup>, Xin Li<sup>1,7</sup>, and Yuesi Wang<sup>1</sup>

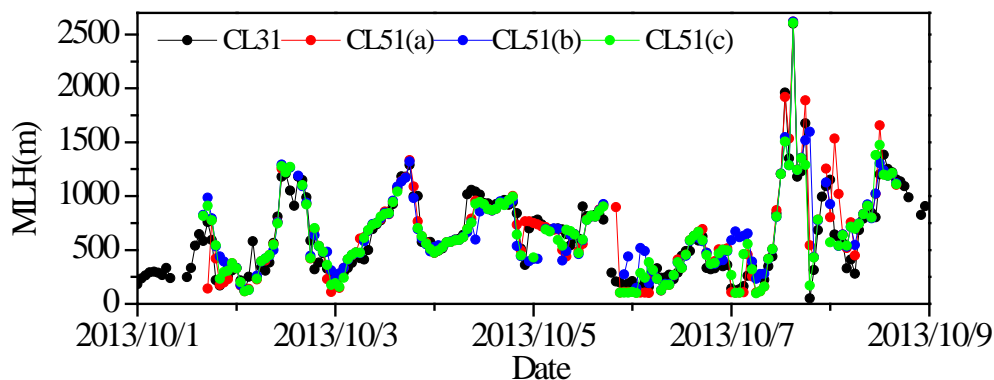

Fig. S1 Comparison between MLH measured by CL31 and by CL51 (a), CL51 (b) and CL51(c).

Table S1. Seasonal averages of MLH at the BJ, SJZ, TJ and QHD stations in NCP from December 2013 to November 2014.

| Station | Spring(m) | Summer(m) | Autumn(m) | Winter(m) |
|---------|-----------|-----------|-----------|-----------|
| BJ      | 655±166   | 722±169   | 531±169   | 493±131   |
| SJZ     | 489±142   | 623±161   | 404±147   | 347±153   |
| TJ      | 627±189   | 655±165   | 493±169   | 436±178   |
| QHD     | 498±217   | 447±153   | 451±146   | 467±180   |

Table S2 Annual means of T, RH, MLH and  $V_c$  for the BJ, SJZ, TJ and QHD stations in NCP from December 2013 to November 2014.

|     | T(°C) | RH (%) | MLH (m) | $V_c$ ( $m^2 s^{-1}$ ) |
|-----|-------|--------|---------|------------------------|
| BJ  | 13.7  | 51.2   | 594     | 3054.5                 |
| SJZ | 13.5  | 65.7   | 464     | 2045.4                 |
| TJ  | 14.1  | 57.0   | 546     |                        |
| QHD | 10.9  | 68.6   | 465     | 3021.0                 |

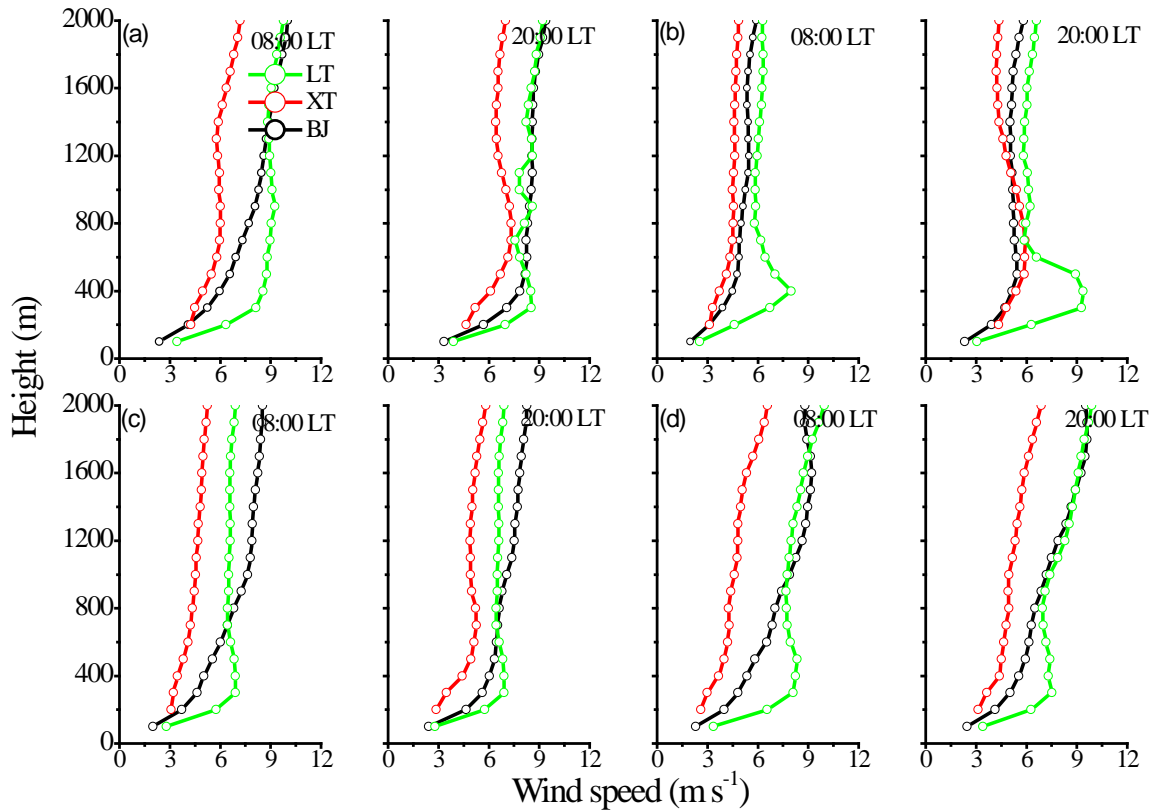

Fig.S2 Vertical profiles of horizontal wind speed at the BJ, XT and LT stations in (a) spring, (b) summer, (c) autumn and (d) winter.

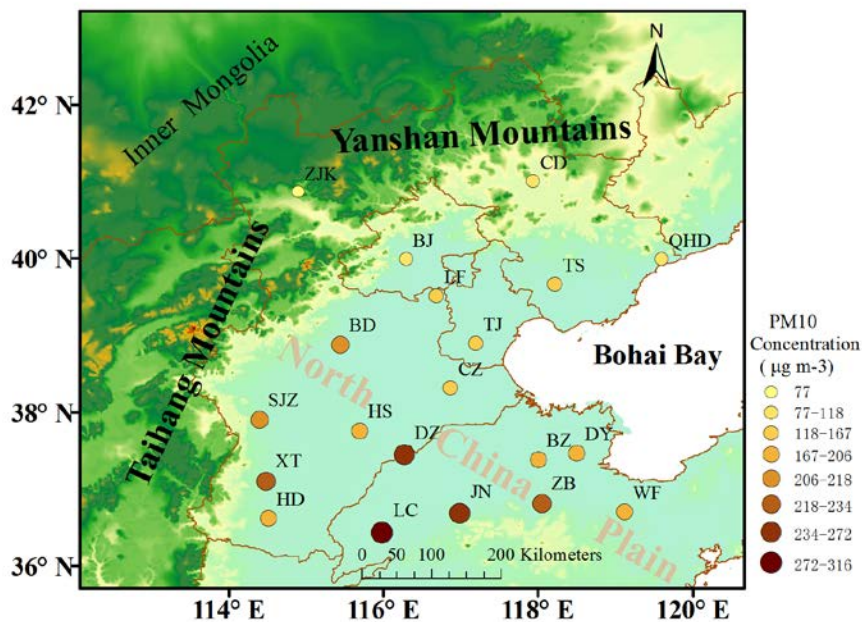

Fig. S3 Distributions of  $PM_{10}$  concentrations at the NCP. The  $PM_{10}$  observation sites (ZJK, CD, BJ, QHD, TJ, LF, TS, CZ, BD, SJZ, HS, XT, HD, DZ, LC, JN, BZ, DY, ZB and WF) were marked in the map with black abbreviations. The sizes and colors of the circular marks are representatives of the annual means of near-ground  $PM_{10}$  concentrations, the bigger and darker the circle, the larger the concentrations.
